# Supplementary material
Source: publisher figshare collection journal article supplement (https://tandf.figshare.com/ndownloader/files/18776390)
Supplement: Supplementary file 1 [file 18776390]

**Figure s1. Pseudo-first-order sorption kinetics of Disperse red 60 dye at 20** °C **and pH 6 by 50 mg of :**

**a) NCCF b) NCCA**

**Figure s2. Plots for evaluating intraparticle diffusion rate constant for sorption of Dispersed red 60 dye at 20** °C **and pH 6 by 50 mg of :**

**a) NCCF b) NCCA**

**Figure s3. Plots for evaluating Elovich kinetic model for sorption of**

**Disperse red 60 dye at 20** °C **and pH 6 by 50 mg of :**

**a) NCCF b) NCCA**
